# Supplementary material for: Combination of human endothelial colony-forming cells and mesenchymal stromal cells exert neuroprotective effects in the growth-restricted newborn
Source: PubMed Central journal article supplement (PMC8602245; doi:10.1038/s41536-021-00185-5), 2021-11-18
Supplement: 41536_2021_185_MOESM1_ESM.pdf [file 41536_2021_185_MOESM1_ESM.pdf]

**Supplementary Table 1:**

| <b>Primary Antibody</b>                               | <b>Host</b> | <b>Dilution</b> | <b>Catalogue#</b>       |
|-------------------------------------------------------|-------------|-----------------|-------------------------|
| Anti-human CD34-PE                                    | Mouse       | 1:25            | Bio-Rad (MCA1578PE)     |
| Anti-human CD45-FITC                                  | Mouse       | 1:25            | BioLegend (304006)      |
| Anti-human CD31-V450                                  | Mouse       | 1:30            | BD Biosciences (561653) |
| Anti-human CD105-PE                                   | Mouse       | 1:50            | BD Biosciences (560839) |
| Anti-human CD144-FITC                                 | Mouse       | 1:50            | BD Biosciences (560411) |
| Anti-Human CD90-PE.CY5                                | Mouse       | 1:800           | BD Biosciences (555597) |
| Anti-Human CD44-FITC                                  | Mouse       | 1:50            | BD Biosciences (347943) |
| Anti-Human CD29-BV480                                 | Mouse       | 1:50            | BD Biosciences (746592) |
| Anti-Human CD73-FITC                                  | Mouse       | 1:50            | BD Biosciences (561254) |
| Anti-Human CD146-FITC                                 | Mouse       | 1:50            | BD Biosciences (560846) |
| Anti-Human HLA-ABC-PE                                 | Mouse       | 1:50            | BD Biosciences (565291) |
| Anti-Human HLA-DR-PE                                  | Mouse       | 1:50            | BD Biosciences (567054) |
| Anti-Human HLA-DR/DP/DQ-FITC                          | Mouse       | 1:50            | BD Biosciences (555558) |
| 7AAD                                                  |             | 1:40            | BD Pharmingen (559925)  |
| Lamin A/C                                             | Rabbit      | 1:200           | Abcam (ab108595)        |
| Endothelial progenitor cells (CD34)                   | Goat        | 1:1000          | R&D Systems (AF3890)    |
| Collagen IV (Col IV)                                  | Rabbit      | 1:1000          | Abcam (ab6586)          |
| Endothelial cells (CD31)                              | Rabbit      | 1:500           | Abcam (ab28364)         |
| Albumin                                               | Sheep       | 1:1000          | Abcam (ab8940)          |
| IgG                                                   | Goat        | 1:1000          | JIR (114-005-003)       |
| S100B                                                 | Rabbit      | 1:1000          | Invitrogen (PA5-78161)  |
| Ionised calcium binding adaptor molecule-1 (Iba-1)    | Goat        | 1:1000          | Abcam (ab5076)          |
| Glial fibrillary acidic protein (GFAP)                | Mouse       | 1:1000          | Sigma (G3893)           |
| Glial fibrillary acidic protein (GFAP)                | Rabbit      | 1:2000          | DAKO (Z0334)            |
| Neuronal Nuclei (NeuN)                                | Rabbit      | 1:1000          | Abcam (ab177487)        |
| Microtubule-associated protein 2 (MAP2)               | Mouse       | 1:500           | Sigma-Aldrich (M4403)   |
| Cleaved Caspase-3                                     | Rabbit      | 1:500           | Cell Signaling (#9661)  |
| Caspase-9                                             | Rabbit      | 1:500           | Abcam (ab32539)         |
| Myelin Binding Protein (MBP)                          | Rat         | 1:1000          | Abcam (ab7349)          |
| Neurofilament (NF)                                    | Mouse       | 1:500           | Abcam (ab134306)        |
| Oligodendrocyte marker 2 (Olig2)                      | Rabbit      | 1:1000          | Genetex (GTX132732)     |
| <b>Secondary Antibody</b>                             |             |                 |                         |
| $\alpha$ -Rat Alexa Fluor 488                         | Donkey      | 1:1000          | Invitrogen (A-21208)    |
| $\alpha$ -Rabbit Alexa Fluor 488                      | Donkey      | 1:1000          | Invitrogen (A-21206)    |
| $\alpha$ -Goat Alexa Fluor 568                        | Donkey      | 1:1000          | Invitrogen (A-11057)    |
| $\alpha$ -Mouse Alexa Fluor 568                       | Donkey      | 1:1000          | Invitrogen (A10037)     |
| $\alpha$ -Rabbit Alexa Fluor 594                      | Donkey      | 1:1000          | Invitrogen (A-21207)    |
| $\alpha$ -Goat Alexa Fluor 647                        | Donkey      | 1:1000          | Invitrogen (A-21447)    |
| $\alpha$ -Mouse Alexa Fluor 647                       | Donkey      | 1:1000          | Invitrogen (A-31571)    |
|                                                       |             |                 |                         |
| DAPI (4',6-Diamidino-2-Phenylindole, Dihydrochloride) | -           | 1:2000          | Invitrogen (D1306)      |

**Supplementary Table 2:**

| <b>Glial characterisation</b>                                   |              |                                |                  |                 |
|-----------------------------------------------------------------|--------------|--------------------------------|------------------|-----------------|
| <i>Parietal cortex</i>                                          | <b>NG</b>    | <b>FGR</b>                     | <b>FGR+cECFC</b> | <b>NG+cECFC</b> |
| Total microglia (Iba-1 <sup>+</sup> cells/mm <sup>2</sup> )     | 450.0 ±15.22 | 602.7 ±26.95 <sup>a b c</sup>  | 497.8 ±16.85     | 460.3 ±20.14    |
| Activated microglia (Iba-1 <sup>+</sup> cells/mm <sup>2</sup> ) | 70.32 ±9.52  | 132.8 ±7.79 <sup>a b c</sup>   | 91.69 ±5.21      | 80.72 ±5.51     |
| GFAP <sup>+</sup> labelled area (%)                             | 8.39 ±0.39   | 10.96 ±0.61 <sup>a b c</sup>   | 9.01 ±0.50       | 8.63 ±0.38      |
| GFAP <sup>+</sup> cells/mm <sup>2</sup>                         | 589.9 ±30.49 | 775.5 ±45.00 <sup>a b</sup>    | 598.8 ±33.91     | 544.3 ±49.67    |
| S100b <sup>+</sup> cells/mm <sup>2</sup>                        | 380.4 ±26.38 | 268.4 ±21.16 <sup>a b c</sup>  | 350.7 ±20.47     | 367.0 ±18.36    |
| <b>Intragyral white matter</b>                                  |              |                                |                  |                 |
| Activated microglia (Iba-1 <sup>+</sup> cells/mm <sup>2</sup> ) | 71.7 ±7.63   | 140.06 ±11.04 <sup>a b c</sup> | 97.88 ±8.69      | 74.95 ±6.08     |
| GFAP <sup>+</sup> labelled area (%)                             | 6.33 ±0.46   | 11.15 ±0.55 <sup>a b</sup>     | 7.69 ±0.53       | 6.38 ±0.32      |
| <b>Subcortical white matter</b>                                 |              |                                |                  |                 |
| Activated microglia (Iba-1 <sup>+</sup> cells/mm <sup>2</sup> ) | 81.42 ±6.87  | 142.03 ±13.33 <sup>a b c</sup> | 103.22 ±4.82     | 82.97 ±4.26     |
| GFAP <sup>+</sup> labelled area (%)                             | 6.44 ±0.39   | 9.92 ±0.62 <sup>a</sup>        | 8.23 ±0.70       | 6.28 ±0.26      |
| <b>Periventricular white matter</b>                             |              |                                |                  |                 |
| Activated microglia (Iba-1 <sup>+</sup> cells/mm <sup>2</sup> ) | 79.17 ±9.24  | 136.41 ±16.13 <sup>a c</sup>   | 102.24 ±7.99     | 80.58 ±5.60     |
| GFAP <sup>+</sup> labelled area (%)                             | 7.51 ±0.70   | 11.19 ±0.37 <sup>a b</sup>     | 8.81 ±0.48       | 6.83 ±0.54      |
| <b>Neuronal and white matter assessment</b>                     |              |                                |                  |                 |
| NeuN <sup>+</sup> cells/mm <sup>2</sup>                         | 964.6 ±36.58 | 663.3 ±43.27 <sup>a b c</sup>  | 843.8 ±47.93     | 924.6 ±46.23    |
| MAP2 <sup>+</sup> labelled area (%)                             | 9.68 ±0.53   | 6.75 ±0.52 <sup>a b c</sup>    | 9.30 ±0.59       | 9.67 ±0.49      |
| Caspase 3 <sup>+</sup> cells/mm <sup>2</sup>                    | 337.2 ±32.69 | 586.4 ±28.30 <sup>a b c</sup>  | 348.2 ±37.71     | 330.5 ±36.24    |
| Caspase 9 <sup>+</sup> cells/mm <sup>2</sup>                    | 297.5 ±17.26 | 498.3 ±22.31 <sup>a b c</sup>  | 357.1 ±26.36     | 321.1 ±14.14    |
| MBP/NF co-localisation (%)                                      | 72.31 ±4.30  | 54.75 ±2.99 <sup>a b c</sup>   | 67.03 ±2.49      | 67.74 ±3.16     |
| MBP <sup>+</sup> labelled area (%)                              | 39.63 ±1.99  | 27.55 ±2.13 <sup>a b c</sup>   | 37.90 ±1.80      | 39.71 ± 2.48    |
| Olig2 <sup>+</sup> cells/mm <sup>2</sup>                        | 621.5 ±23.59 | 378.8 ±29.84 <sup>a b c</sup>  | 583.5 ±64.61     | 597.9 ±40.25    |

**NOTE:**

<sup>a</sup> p < .05 vs. NG

<sup>b</sup> p < .05 vs. FGR+cECFC

<sup>c</sup> p < .05 vs. NG+cECFC

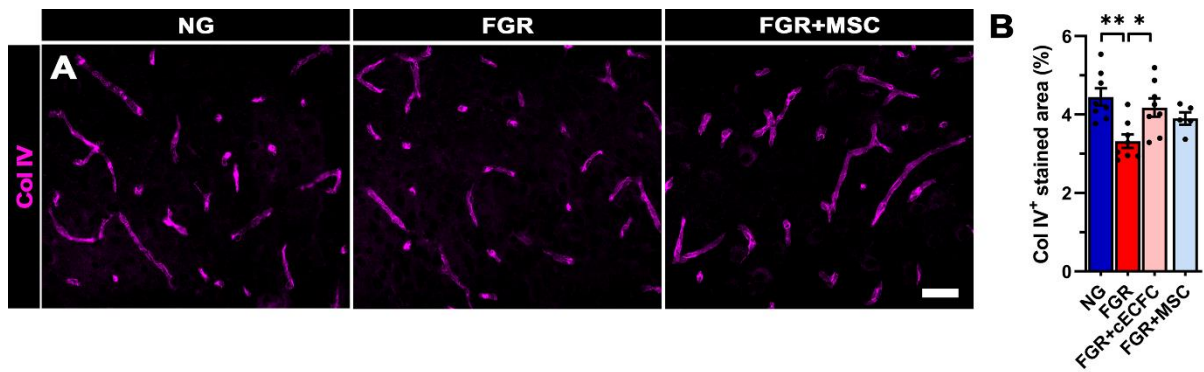

**Supplementary Fig. 1. Mesenchymal stromal cell treatment does not improve vascular expression of Col IV in FGR brain.** (A) Col IV labelling showed no significant improvement in microvessel density following treatment with MSC only. (B) Analysis confirmed no significant recovery in Col IV-positive labelled area. All values are expressed as mean  $\pm$  SEM (minimum  $n=5$  for all groups). Two-way ANOVA with Tukey post-hoc test ( $*p<0.05$ ,  $**p<0.01$ ) (Scale bars: 50  $\mu\text{m}$ )

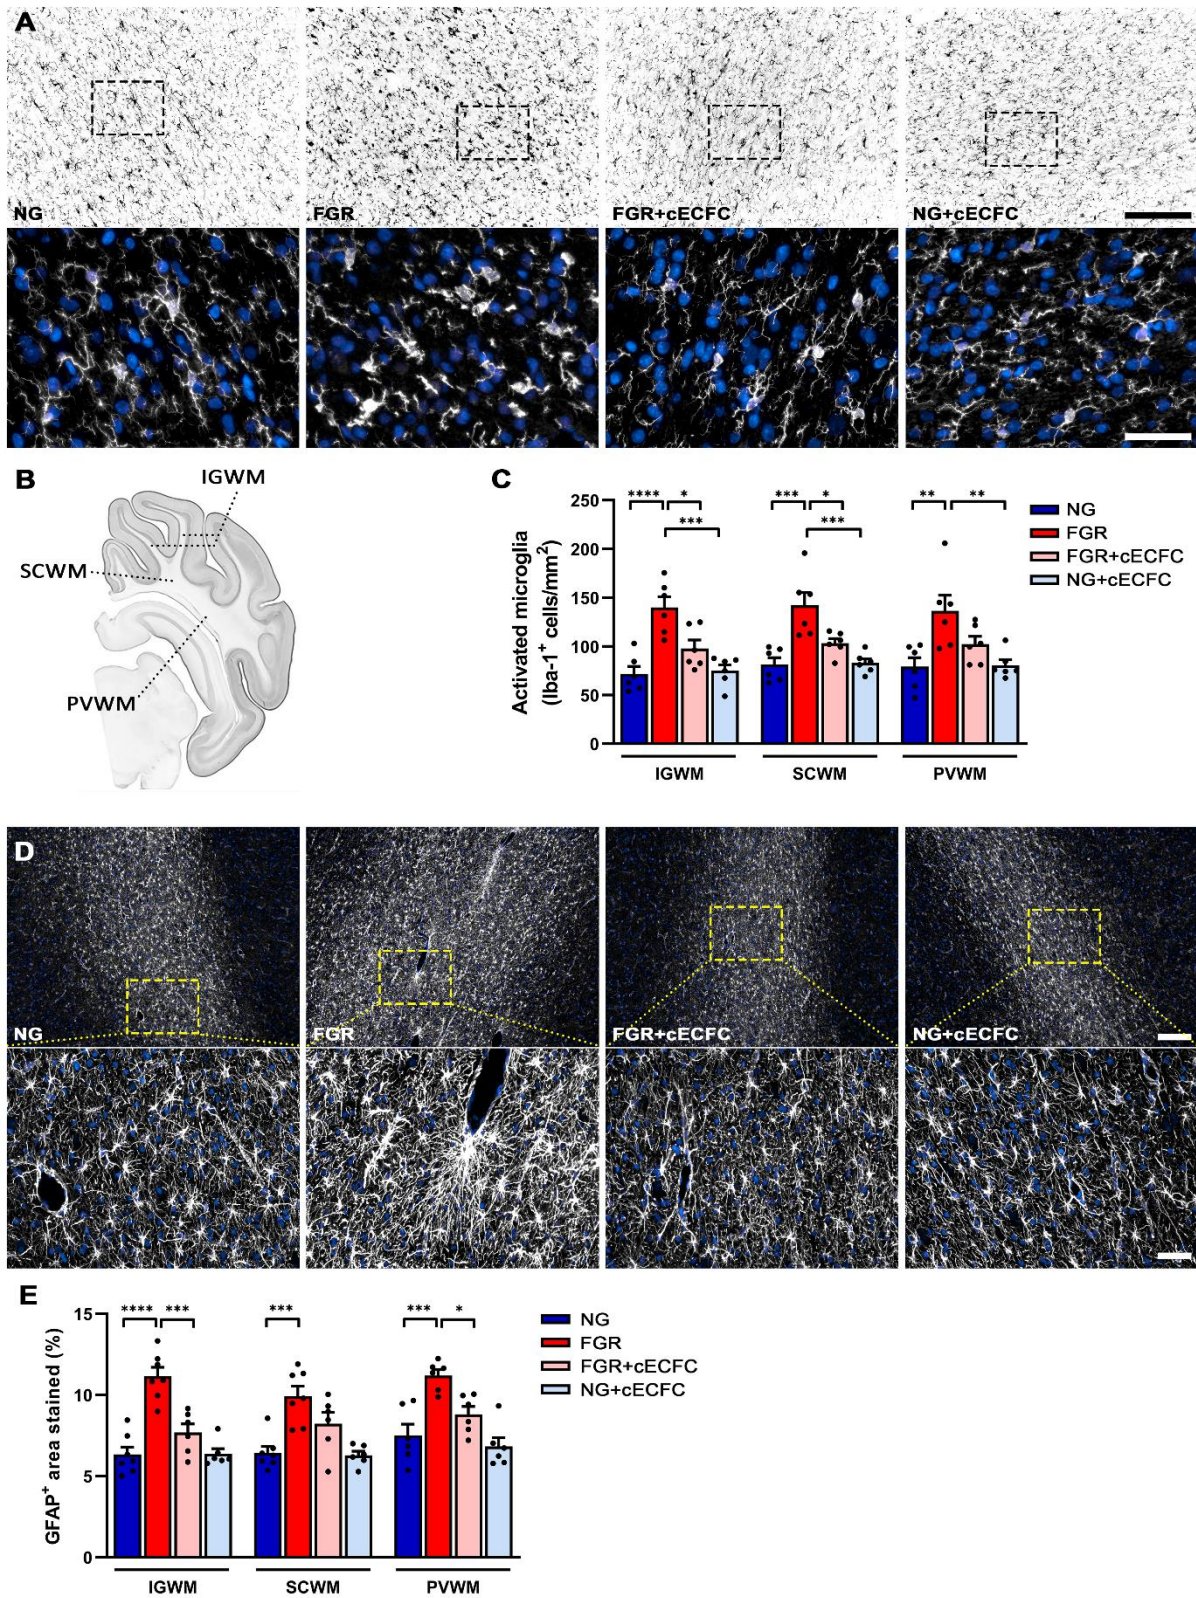

**Supplementary Fig. 2. Elevated glial activation in white matter is ameliorated following**

**cECFC treatment in FGR. (A)** Representative labelling of microglia (Iba-1) in the

intragyrus white matter (IGWM) of NG brain shows even cellular distribution orientated

longitudinally with extended processes, indicative of ramified (resting) microglia. Microglia in FGR white matter demonstrate activated morphology. FGR+cECFC displayed normalised microglia morphology comparable to NG brains. NG+cECFC animals showed no evident alterations in microglia morphology. **(B)** Schematic outline of key white matter regions examined: IGWM, subcortical white matter (SCWM), and periventricular white matter (PVWM). **(C)** FGR brain demonstrated significantly elevated activated microglia counts in all white matter regions when compared with NG brains. Administration of cECFCs significantly ameliorated microglial activation in the IGWM and SCWM but not the PVWM. **(D)** Representative labelling of astrocytes (GFAP) in the intragyral white matter (IGWM) of NG brain shows even cellular distribution of ramified (resting) astrocytes. Astrocytes in FGR white matter demonstrate activated morphology. FGR+cECFC displayed normalised astrocyte morphology comparable to NG brains. Administration of cECFCs to NG animals showed no evident alterations in astrocyte morphology. **(E)** GFAP-positive labelled area was significantly elevated in FGR for all white matter regions when compared with NG brains. Administration of cECFCs significantly ameliorated astrocyte activation in the IGWM and PVWM. All values are expressed as mean +/- SEM (minimum  $n=6$  for all groups). Two-way *ANOVA* with Tukey post-hoc test (\* $p<0.05$ , \*\*\* $p<0.001$ , \*\*\*\* $p<0.0001$ ) (Scale bars: low magnification: 200 $\mu\text{m}$ ; high magnification: 50 $\mu\text{m}$ ).

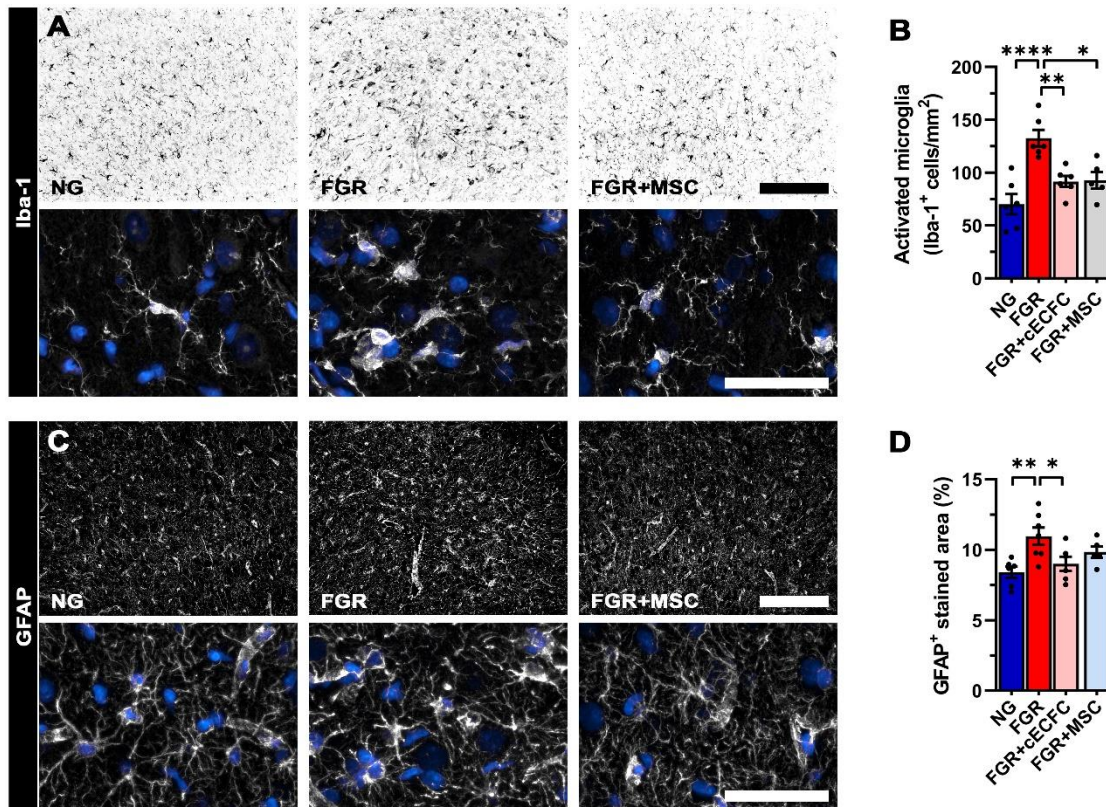

**Supplementary Fig. 3. Mesenchymal stromal cell treatment attenuates microglial but**

**not astrocyte activation in FGR brains. (A)** Representative labelling of microglial

expression (Iba-1; black) in the parietal cortex. **(B)** Treatment with MSCs significantly

ameliorated the number of activated microglia. **(C)** Astrocytes (GFAP; white) showed evident

alterations in morphology. FGR displayed activated astrocyte morphology compared with

resting morphology of NG. **(D)** MSC treatment did not reduce astrocyte activation as

assessed with aerial coverage of GFAP-positive labelled regions compared with untreated

FGR. All values are expressed as mean +/- SEM (minimum n=5 for all groups). Two-way

ANOVA with Tukey post-hoc test (\*p<0.05, \*\*p<0.01, \*\*\*\*p<0.0001) (Scale bars: 50 μm;

low magnification: 200 μm).

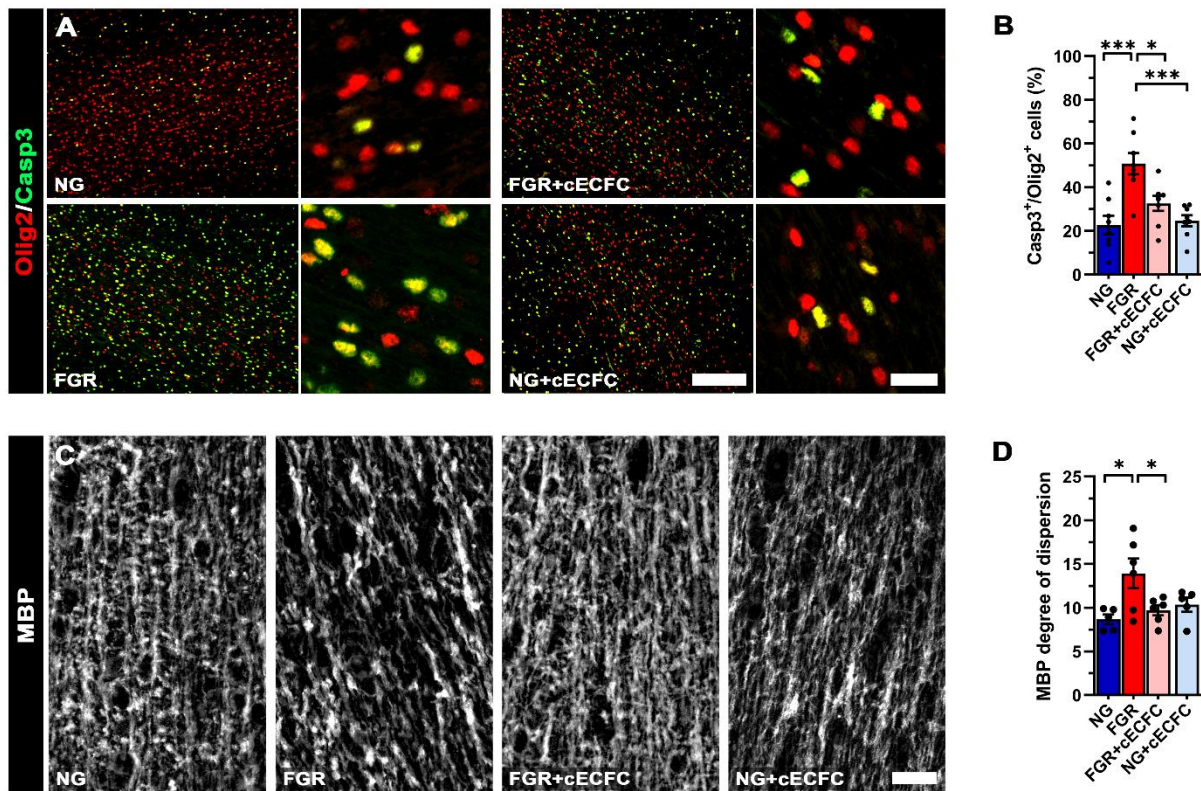

**Supplementary Fig. 4. cECFC administration reduces oligodendrocyte apoptosis and improves white matter orientation.** (A) Increased apoptosis (Casp3; green) of pan oligodendrocytes (Olig2; red) in the IGWM of FGR brain at postnatal day 4. (B) Administration of cECFCs significantly decreased apoptosis of oligodendrocytes in FGR compared with untreated FGR. (C) Representative labelling of MBP to demonstrate orientation of myelination along axonal fibers in the IGWM. FGR display more diffuse and disorganised labelling patterns compared with all other groups. (D) Directionality analysis showed an increase in dispersion of MBP orientation in the IGWM. FGR+cECFC displayed less variable dispersion comparable to that observed in NG and NG+cECFC groups. All values are expressed as mean  $\pm$  SEM (minimum  $n=5$  for all groups). Two-way ANOVA with Tukey post-hoc test (\* $p<0.05$ , \*\*\* $p<0.001$ ) (Scale bars: 50  $\mu\text{m}$ ; low magnification A: 200  $\mu\text{m}$ ).

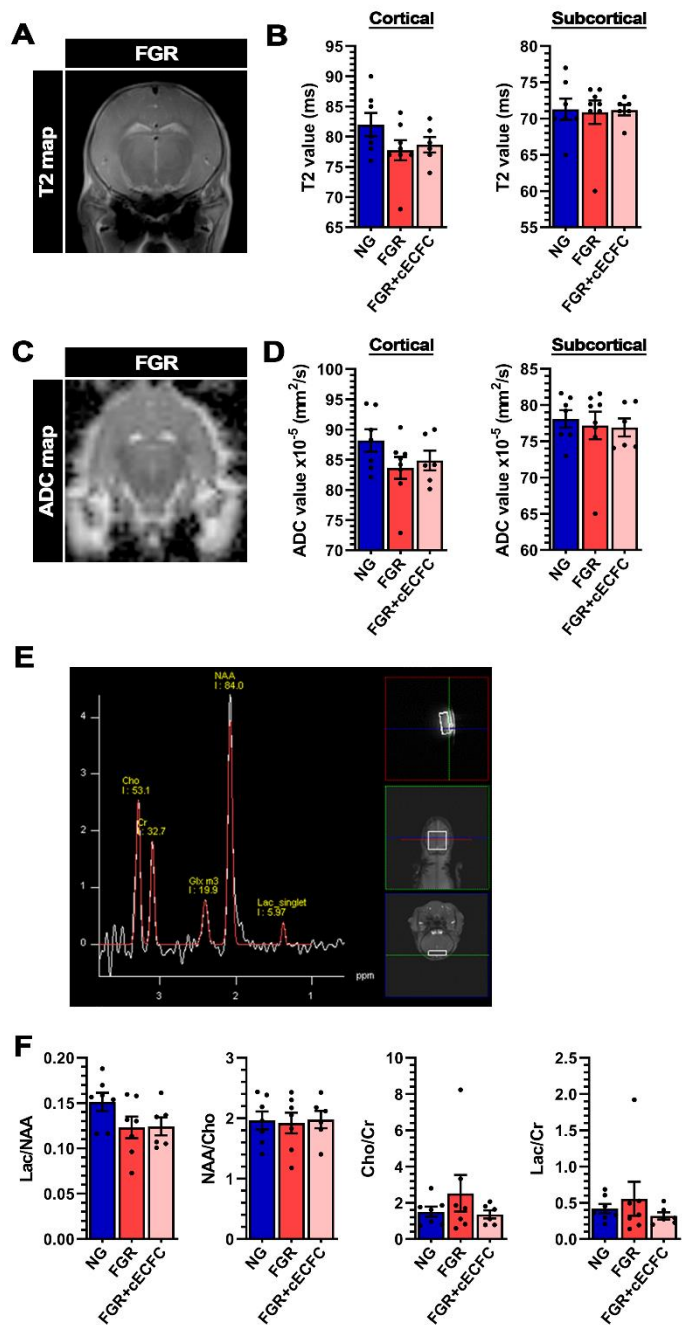

**Supplementary Fig. 5. MRI and MRS analyses found no overt differences between NG, FGR and FGR+cECFC animals at day 4.** Exemplar coronal views of MRI T2 maps (**A**) and ADC maps (**C**) from an FGR brain at P4. Analysis of T2 and ADC acquisitions showed no significant differences between groups in the cortical or subcortical regions (**B & D**). (**E**) Representative snapshot of spectrogram showing the fronto-parietal brain voxel used to study brain metabolites. (**F**) No significant differences in metabolite ratios were observed between



NG, FGR, and FGR+cECFC animals. Lactate (Lac), N-Acetylaspartate (NAA), Choline (Chol), Creatine (Cr).

**A**

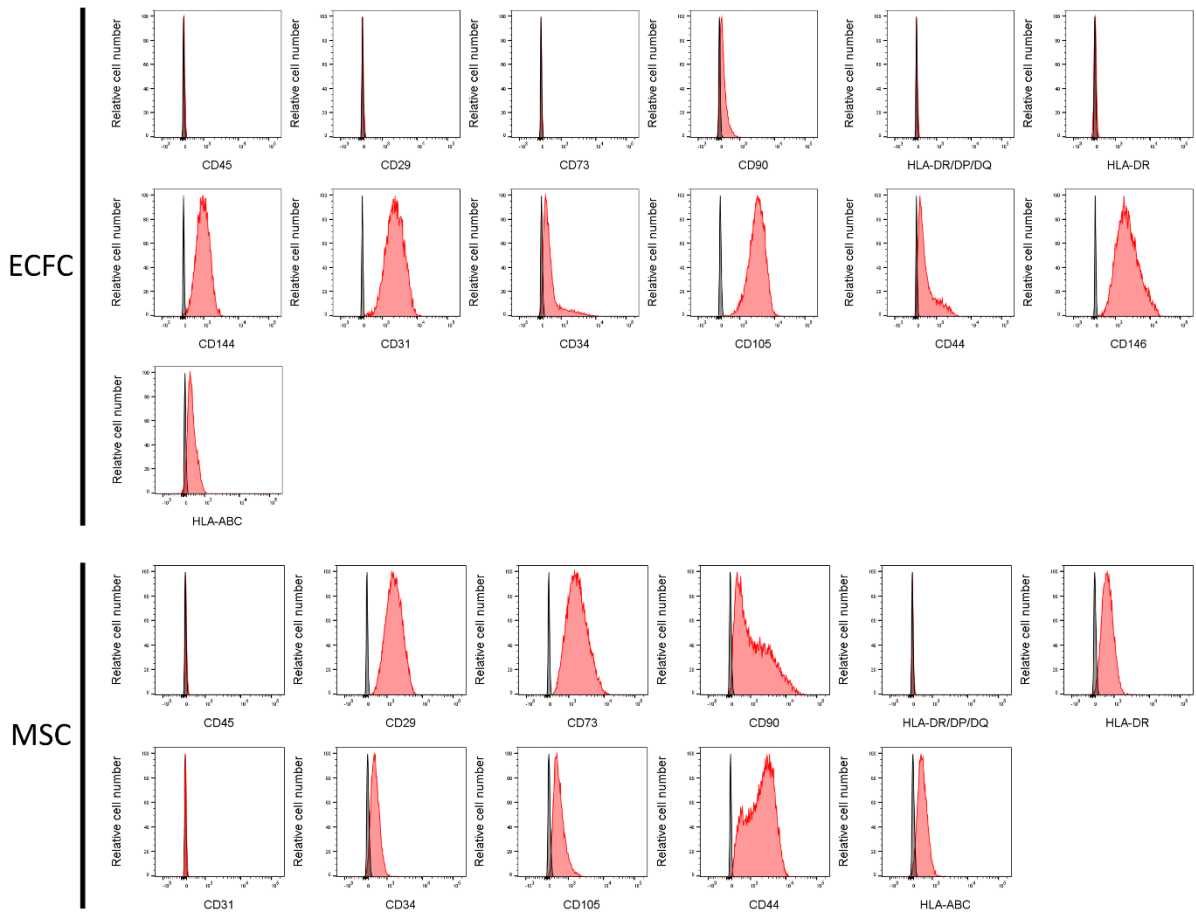

**Supplementary Fig. 6. A collection of cell surface markers were used to characterise and confirm ECFC and MSC phenotype via flow cytometry.**
